# Supplementary material for: Environmental Factors Associated with Physical Activity in Rural U.S. Counties
Source: MDPI journal article supplement (doi:10.3390/ijerph18147688), 2021-07-20
Supplement: s1 [file s1]

Supplementary Table S1. Bivariate Correlations for Male and Female Physical Activity by Natural Environment Indicators

| Indicator         | All Groups (n= 2679)                  |      |      |      |      |      |   | Urban (n= 565, 0-25% rural)  |      |      |      |      |      |   | Somewhat Urban (n= 573, 25-48% rural)  |      |      |      |      |     |   |
|-------------------|---------------------------------------|------|------|------|------|------|---|------------------------------|------|------|------|------|------|---|----------------------------------------|------|------|------|------|-----|---|
|                   | 1                                     | 2    | 3    | 4    | 5    | 6    | 7 | 1                            | 2    | 3    | 4    | 5    | 6    | 7 | 1                                      | 2    | 3    | 4    | 5    | 6   | 7 |
| 1 Male PA         | -                                     |      |      |      |      |      |   | -                            |      |      |      |      |      |   | -                                      |      |      |      |      |     |   |
| 2 Female PA       | .87                                   | -    |      |      |      |      |   | .86                          | -    |      |      |      |      |   | .82                                    | -    |      |      |      |     |   |
| 3 Air Temperature | -.48                                  | -.54 | -    |      |      |      |   | -.35                         | -.41 | -    |      |      |      |   | -.53                                   | -.59 | -    |      |      |     |   |
| 4 Heat Index*     | -.48                                  | -.52 | .69  | -    |      |      |   | -.47                         | -.53 | .62  | -    |      |      |   | -.55                                   | -.59 | .70  | -    |      |     |   |
| 5 Precipitation   | -.21                                  | -.26 | -.13 | .09  | -    |      |   | .03                          | -.04 | -.31 | .08  | -    |      |   | -.06                                   | -.20 | -.13 | .13  | -    |     |   |
| 6 Sun             | -.23                                  | -.29 | .85  | .34  | -.37 | -    |   | -.14                         | -.17 | .84  | .22  | -.53 | -    |   | -.25                                   | -.28 | .81  | .27  | -.41 | -   |   |
| 7 Water*          | .21                                   | .19  | -.11 | -.13 | .04  | .04  | - | .10                          | .07  | -.02 | -.02 | .18  | .12  | - | .15                                    | .15  | -.07 | -.10 | .10  | .02 | - |
| Parameter         | Somewhat Rural (n= 577, 48-67% rural) |      |      |      |      |      |   | Rural (n= 577, 67-99% rural) |      |      |      |      |      |   | Exclusively Rural (n= 387, 100% rural) |      |      |      |      |     |   |
|                   | 1                                     | 2    | 3    | 4    | 5    | 6    | 7 | 1                            | 2    | 3    | 4    | 5    | 6    | 7 | 1                                      | 2    | 3    | 4    | 5    | 6   | 7 |
| 1 Male PA         | -                                     |      |      |      |      |      |   | -                            |      |      |      |      |      |   | -                                      |      |      |      |      |     |   |
| 2 Female PA       | .85                                   | -    |      |      |      |      |   | .87                          | -    |      |      |      |      |   | .92                                    | -    |      |      |      |     |   |
| 3 Air Temperature | -.57                                  | -.62 | -    |      |      |      |   | -.56                         | -.61 | -    |      |      |      |   | -.53                                   | -.60 | -    |      |      |     |   |
| 4 Heat Index*     | -.50                                  | -.53 | .74  | -    |      |      |   | -.42                         | -.46 | .76  | -    |      |      |   | -.34                                   | -.37 | .70  | -    |      |     |   |
| 5 Precipitation   | -.17                                  | -.23 | -.15 | -.01 | -    |      |   | -.30                         | -.30 | -.09 | -.03 | -    |      |   | -.51                                   | -.51 | .17  | .14  | -    |     |   |
| 6 Sun             | -.38                                  | -.43 | .88  | .44  | -.36 | -    |   | -.39                         | -.45 | .91  | .55  | -.24 | -    |   | -.33                                   | -.42 | .87  | .39  | -.04 | -   |   |
| 7 Water*          | .20                                   | .17  | -.21 | -.17 | .04  | -.12 | - | .30                          | .30  | -.24 | -.19 | -.15 | -.07 | - | .12                                    | .11  | -.10 | -.15 | -.03 | .06 | - |

Notes: \*= indicator required a log transform using the following equation:  $\text{LOG1PX}(x) = \log(1 + x)$ 

Supplementary Table S2. Bivariate Correlations for Male and Female Physical Activity by Social Environment Indicators

| All Groups (n= 2577) | Urban (n= 571, 0-25% rural) | Somewhat Urban (n= 561, 25-48% rural) |
|----------------------|-----------------------------|---------------------------------------|
|----------------------|-----------------------------|---------------------------------------|

| Indicator                  | 1                                     | 2    | 3   | 4   | 5   | 6 | 1                            | 2    | 3    | 4   | 5   | 6 | 1                                      | 2    | 3   | 4   | 5   | 6 |
|----------------------------|---------------------------------------|------|-----|-----|-----|---|------------------------------|------|------|-----|-----|---|----------------------------------------|------|-----|-----|-----|---|
| 1 Male PA                  | -                                     |      |     |     |     |   | -                            |      |      |     |     |   | -                                      |      |     |     |     |   |
| 2 Female PA                | .87                                   | -    |     |     |     |   | .86                          | -    |      |     |     |   | .82                                    | -    |     |     |     |   |
| 3 Alcohol Vehicle Deaths   | .08                                   | .08  | -   |     |     |   | .04                          | .06  | -    |     |     |   | .10                                    | .09  | -   |     |     |   |
| 4 Violent Crime*           | -.10                                  | -.19 | .04 | -   |     |   | -.27                         | -.34 | .01  | -   |     |   | -.32                                   | -.41 | .01 | -   |     |   |
| 5 Single Parent Households | -.36                                  | -.47 | .03 | .50 | -   |   | -.45                         | -.54 | .01  | .69 | -   |   | -.42                                   | -.52 | .02 | .57 | -   |   |
| 6 Vacant Housing*          | -.15                                  | -.15 | .07 | .02 | .25 | - | -.17                         | -.22 | -.02 | .34 | .44 | - | .06                                    | .05  | .09 | .24 | .26 | - |
|                            | Somewhat Rural (n= 554, 48-67% rural) |      |     |     |     |   | Rural (n= 554, 67-99% rural) |      |      |     |     |   | Exclusively Rural (n= 337, 100% rural) |      |     |     |     |   |
| Parameter                  | 1                                     | 2    | 3   | 4   | 5   | 6 | 1                            | 2    | 3    | 4   | 5   | 6 | 1                                      | 2    | 3   | 4   | 5   | 6 |
| 1 Male PA                  | -                                     |      |     |     |     |   | -                            |      |      |     |     |   | -                                      |      |     |     |     |   |
| 2 Female PA                | .85                                   | -    |     |     |     |   | .87                          | -    |      |     |     |   | .93                                    | -    |     |     |     |   |
| 3 Alcohol Vehicle Deaths   | .05                                   | .05  | -   |     |     |   | .17                          | .16  | -    |     |     |   | .05                                    | .05  | -   |     |     |   |
| 4 Violent Crime*           | -.30                                  | -.41 | .08 | -   |     |   | -.22                         | -.29 | .01  | -   |     |   | -.17                                   | -.25 | .11 | -   |     |   |
| 5 Single Parent Households | -.46                                  | -.59 | .07 | .60 | -   |   | -.26                         | -.38 | .01  | .46 | -   |   | -.40                                   | -.51 | .05 | .33 | -   |   |
| 6 Vacant Housing*          | -.05                                  | -.10 | .13 | .31 | .40 | - | .22                          | .18  | .10  | .17 | .25 | - | .08                                    | .01  | .06 | .28 | .20 | - |

Notes: \*= indicator required a log transform using the following equation:  $\text{LOG1PX}(x) = \log(1 + x)$

Supplementary Table S3. Bivariate Correlations for Male and Female Physical Activity by Recreation Environment Indicators

|                                    | All Groups (n= 2686) |      |   |   |   |   | Urban (n= 576, 0-25% rural) |      |   |   |   |   | Somewhat Urban (n= 576, 25-48% rural) |      |   |   |   |   |
|------------------------------------|----------------------|------|---|---|---|---|-----------------------------|------|---|---|---|---|---------------------------------------|------|---|---|---|---|
| Indicator                          | 1                    | 2    | 3 | 4 | 5 | 6 | 1                           | 2    | 3 | 4 | 5 | 6 | 1                                     | 2    | 3 | 4 | 5 | 6 |
| 1 Male PA                          | -                    |      |   |   |   |   | -                           |      |   |   |   |   | -                                     |      |   |   |   |   |
| 2 Female PA                        | 0.87                 | -    |   |   |   |   | 0.86                        | -    |   |   |   |   | 0.82                                  | -    |   |   |   |   |
| 3 Access to Exercise Opportunities | 0.45                 | 0.46 | - |   |   |   | 0.30                        | 0.32 | - |   |   |   | 0.31                                  | 0.35 | - |   |   |   |

|           |                                  |                                              |      |      |       |      |   |                                     |       |      |       |      |   |                                               |       |       |      |      |   |
|-----------|----------------------------------|----------------------------------------------|------|------|-------|------|---|-------------------------------------|-------|------|-------|------|---|-----------------------------------------------|-------|-------|------|------|---|
| 4         | Live within 150 Miles of Highway | 0.19                                         | 0.15 | 0.36 | -     |      |   | -0.10                               | -0.13 | 0.19 | -     |      |   | 0.05                                          | 0.04  | 0.12  | -    |      |   |
| 5         | Live within Half-Mile of Park    | 0.43                                         | 0.44 | 0.51 | 0.33  | -    |   | 0.22                                | 0.27  | 0.55 | 0.17  | -    |   | 0.25                                          | 0.34  | 0.35  | 0.03 | -    |   |
| 6         | Elementary Half-Mile             | 0.23                                         | 0.27 | 0.20 | 0.21  | 0.54 | - | -0.13                               | -0.04 | 0.20 | 0.27  | 0.50 | - | -0.02                                         | 0.11  | 0.13  | 0.07 | 0.47 | - |
|           |                                  | <b>Somewhat Rural (n= 576, 48-67% rural)</b> |      |      |       |      |   | <b>Rural (n= 577, 67-99% rural)</b> |       |      |       |      |   | <b>Exclusively Rural (n= 381, 100% rural)</b> |       |       |      |      |   |
| Indicator |                                  | 1                                            | 2    | 3    | 4     | 5    | 6 | 1                                   | 2     | 3    | 4     | 5    | 6 | 1                                             | 2     | 3     | 4    | 5    | 6 |
| 1         | Male PA                          | -                                            |      |      |       |      |   | -                                   |       |      |       |      |   | -                                             |       |       |      |      |   |
| 2         | Female PA                        | 0.85                                         | -    |      |       |      |   | 0.87                                | -     |      |       |      |   | 0.93                                          | -     |       |      |      |   |
| 3         | Access to Exercise Opportunities | 0.43                                         | 0.47 | -    |       |      |   | 0.36                                | 0.37  | -    |       |      |   | 0.25                                          | 0.29  | -     |      |      |   |
| 4         | Live within 150 Miles of Highway | 0.04                                         | 0.06 | 0.14 | -     |      |   | 0.08                                | 0.06  | 0.08 | -     |      |   | 0.00                                          | -0.04 | 0.06  | -    |      |   |
| 5         | Live within Half-Mile of Park*   | 0.25                                         | 0.32 | 0.25 | 0.05  | -    |   | 0.36                                | 0.38  | 0.24 | 0.00  | -    |   | 0.39                                          | 0.41  | 0.15  | 0.05 | -    |   |
| 6         | Elementary Half-Mile             | 0.08                                         | 0.18 | 0.04 | -0.03 | 0.43 | - | 0.26                                | 0.29  | 0.04 | -0.02 | 0.48 | - | 0.36                                          | 0.38  | -0.06 | 0.10 | 0.43 | - |

Notes: \*= indicator required a log transform using the following equation:  $\text{LOG1PX}(x) = \log(1 + x)$

Supplementary Table S4. Bivariate Correlations for Male and Female Physical Activity by Transportation Environment Indicators

|           |                 |                             |      |      |      |   |   |   |                                    |       |      |      |   |   |   |                                              |      |      |      |   |   |   |
|-----------|-----------------|-----------------------------|------|------|------|---|---|---|------------------------------------|-------|------|------|---|---|---|----------------------------------------------|------|------|------|---|---|---|
|           |                 | <b>All Groups (n= 2697)</b> |      |      |      |   |   |   | <b>Urban (n= 577, 0-25% rural)</b> |       |      |      |   |   |   | <b>Somewhat Urban (n= 577, 25-48% rural)</b> |      |      |      |   |   |   |
| Indicator |                 | 1                           | 2    | 3    | 4    | 5 | 6 | 7 | 1                                  | 2     | 3    | 4    | 5 | 6 | 7 | 1                                            | 2    | 3    | 4    | 5 | 6 | 7 |
| 1         | Male PA         | -                           |      |      |      |   |   |   | -                                  |       |      |      |   |   |   | -                                            |      |      |      |   |   |   |
| 2         | Female PA       | 0.88                        | -    |      |      |   |   |   | 0.86                               | -     |      |      |   |   |   | 0.82                                         | -    |      |      |   |   |   |
| 3         | Bike to Work*   | 0.45                        | 0.47 | -    |      |   |   |   | 0.44                               | 0.50  | -    |      |   |   |   | 0.45                                         | 0.51 | -    |      |   |   |   |
| 4         | Walk to Work*   | 0.31                        | 0.36 | 0.44 | -    |   |   |   | 0.14                               | 0.18  | 0.54 | -    |   |   |   | 0.34                                         | 0.41 | 0.57 | -    |   |   |   |
| 5         | Works in County | 0.19                        | 0.18 | 0.37 | 0.36 | - |   |   | -0.05                              | -0.07 | 0.26 | 0.24 | - |   |   | 0.13                                         | 0.16 | 0.37 | 0.43 | - |   |   |

|           |                 |                                       |       |       |       |       |       |       |                              |       |       |       |       |       |      |                                        |       |       |       |       |       |   |
|-----------|-----------------|---------------------------------------|-------|-------|-------|-------|-------|-------|------------------------------|-------|-------|-------|-------|-------|------|----------------------------------------|-------|-------|-------|-------|-------|---|
| 6         | Works in Place* | 0.18                                  | 0.16  | 0.35  | 0.36  | 0.65  | -     | -0.21 | -0.20                        | 0.28  | 0.36  | 0.55  | -     | -0.01 | 0.08 | 0.30                                   | 0.39  | 0.67  | -     |       |       |   |
| 7         | Long Commute    | -0.15                                 | -     | -     | -0.34 | -0.74 | -0.66 | -     | 0.20                         | 0.18  | -0.16 | -0.28 | -0.63 | -0.59 | -    | -0.01                                  | -0.09 | -0.34 | -0.42 | -0.76 | -0.68 | - |
|           |                 | Somewhat Rural (n= 577, 48-67% rural) |       |       |       |       |       |       | Rural (n= 577, 67-99% rural) |       |       |       |       |       |      | Exclusively Rural (n= 389, 100% rural) |       |       |       |       |       |   |
| Indicator |                 | 1                                     | 2     | 3     | 4     | 5     | 6     | 7     | 1                            | 2     | 3     | 4     | 5     | 6     | 7    | 1                                      | 2     | 3     | 4     | 5     | 6     | 7 |
| 1         | Male PA         | -                                     |       |       |       |       |       |       | -                            |       |       |       |       |       |      | -                                      |       |       |       |       |       |   |
| 2         | Female PA       | 0.85                                  | -     |       |       |       |       |       | 0.87                         | -     |       |       |       |       |      | 0.93                                   | -     |       |       |       |       |   |
| 3         | Bike to Work*   | 0.33                                  | 0.37  | -     |       |       |       |       | 0.28                         | 0.29  | -     |       |       |       |      | 0.37                                   | 0.37  | -     |       |       |       |   |
| 4         | Walk to Work*   | 0.28                                  | 0.35  | 0.35  | -     |       |       |       | 0.44                         | 0.46  | 0.35  | -     |       |       |      | 0.36                                   | 0.41  | 0.34  | -     |       |       |   |
| 5         | Works in County | 0.08                                  | 0.09  | 0.26  | 0.34  | -     |       |       | 0.15                         | 0.10  | 0.26  | 0.42  | -     |       |      | 0.16                                   | 0.22  | 0.26  | 0.43  | -     |       |   |
| 6         | Works in Place* | -0.01                                 | 0.03  | 0.22  | 0.37  | 0.58  | -     |       | 0.12                         | 0.06  | 0.19  | 0.37  | 0.57  | -     |      | 0.19                                   | 0.19  | 0.12  | 0.44  | 0.53  | -     |   |
| 7         | Long Commute    | -0.03                                 | -0.10 | -0.26 | -0.31 | -0.75 | -0.57 | -     | -0.23                        | -0.20 | -0.24 | -0.34 | -0.71 | -0.51 | -    | -0.21                                  | -0.25 | -0.29 | -0.37 | -0.73 | -0.60 | - |

Notes: \*= indicator required a log transform using the following equation:  $\text{LOG1PX}(x) = \log(1 + x)$
